# Supplementary material
Source: Research Square preprint supplement (doi:10.21203/rs.3.rs-9663686/v1)
Supplement: Supplementary file 1 [file 3ab18406443974e2b3acaa47.xlsx]

## Sheet: Cis-Elements
Table S1. Cis-regulatory elements identified in the promoter regions of DcCNGC genes
Gene	Cis-Elements
DcCNGC14	ABRE, MYB, W-box, MeJA-responsive, CAAT-box, TATA-box, G-box, TCA, MYC, TCT, STRE, ARE, as-1
DcCNGC13	STRE, TATA-box, MYB, TCT, CAAT-box, TCA, MYC, G-box, Box, ARE, ABRE
DcCNGC16	as-1, MYC, ABRE, MYB, CAAT-box, ARE, W-box, G-box, TATA-box, MeJA-responsive, Box, Ethylene-responsive
DcCNGC15d	Box, MYB, MYC, TATA-box, TCA, MeJA-responsive, CAAT-box, as-1, ARE
DcCNGC1a	TCT, MYB, CAAT-box, W-box, TCA, MYC, TATA-box, Box
DcCNGC2a	MYB, MYC, MeJA-responsive, as-1, ABRE, TATA-box, G-box, Box, CAAT-box, STRE, TCT
DcCNGC2c	MYB, MYC, Ethylene-responsive, Box, TATA-box, CAAT-box, W-box, ARE, STRE, TCA
DcCNGC4d	MYC, G-box, MYB, TCA, CAAT-box, Box, as-1, MeJA-responsive, TATA-box, STRE
DcCNGC15a	ARE, TATA-box, W-box, TCA, CAAT-box, as-1, MYB, G-box, MYC, MeJA-responsive, Box, STRE, ABRE
DcCNGC19	W-box, G-box, CAAT-box, STRE, Ethylene-responsive, TCT, TATA-box, MYB, Box
DcCNGC5	ABRE, MYC, STRE, G-box, MYB, as-1, CAAT-box, MeJA-responsive, TATA-box, ARE, W-box
DcCNGC15b	ABRE, STRE, Box, TATA-box, TCT, CAAT-box, MYC, MYB, ARE, G-box, TCA, W-box
DcCNGC15c	as-1, MeJA-responsive, STRE, MYB, TATA-box, Ethylene-responsive, MYC, CAAT-box, W-box, Box
DcCNGC4a	TCA, ARE, MYB, TCT, Box, TATA-box, W-box, CAAT-box, STRE, MYC, Ethylene-responsive
DcCNGC17	G-box, TATA-box, TCA, MYC, CAAT-box, STRE, MYB, Box, W-box, ABRE, ARE
DcCNGC18	MYC, MYB, CAAT-box, STRE, TCA, ARE, Box, TATA-box
DcCNGC1b	ABRE, CAAT-box, TATA-box, MYB, as-1, W-box, MeJA-responsive, Ethylene-responsive, Box, G-box, TCT, MYC, ARE
DcCNGC20	MYB, MeJA-responsive, Ethylene-responsive, TATA-box, G-box, as-1, MYC, CAAT-box, Box, W-box, ABRE
DcCNGC4c	CAAT-box, Ethylene-responsive
DcCNGC8	as-1, MYC, CAAT-box, TCA, TATA-box, STRE, Ethylene-responsive, MYB, ABRE, G-box, ARE, MeJA-responsive, Box
DcCNGC2b	MYB, Box, CAAT-box, ABRE, TATA-box, TCA, STRE, W-box, G-box, MYC, ARE
DcCNGC4b	MeJA-responsive, as-1, TATA-box, MYC, TCA, STRE, G-box, W-box, MYB, TCT, ARE, ABRE, CAAT-box
DcCNGC2d	ARE, MYB, TATA-box, MYC, TCT, STRE, TCA, CAAT-box, Box, W-box, Ethylene-responsive
DcCNGC2e	CAAT-box, TCT, TATA-box, ARE, Ethylene-responsive, Box, MYC, as-1, STRE, MeJA-responsive, TCA
